# Supplementary material
Source: PubMed Central journal article supplement (PMC9270867)
Supplement: esac016_suppl_supplementary_material.pdf [file esac016_suppl_supplementary_material.pdf]

## Supplemental Figures:

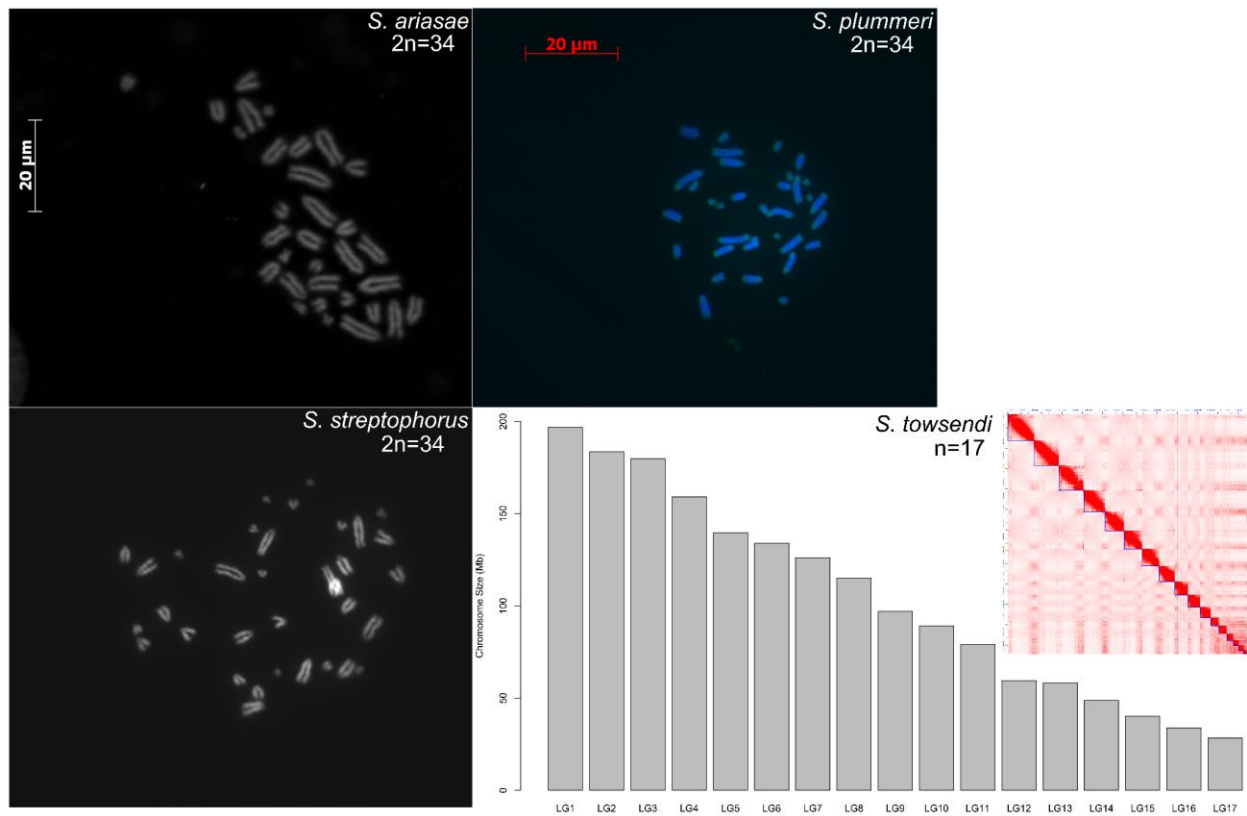

**Supplemental Figure 1:** Karyotypes for *S. ariasae* (female, TG1241), *S. plummeri* (male, TG1244), and *S. streptophorus* (female, TG1247)—relative to the 17 assembled linkage groups in the *S. townsendi* genome—chromosome length bar chart and HiC contact map shown. Karyotype methods outlined in Main et al. 2012.

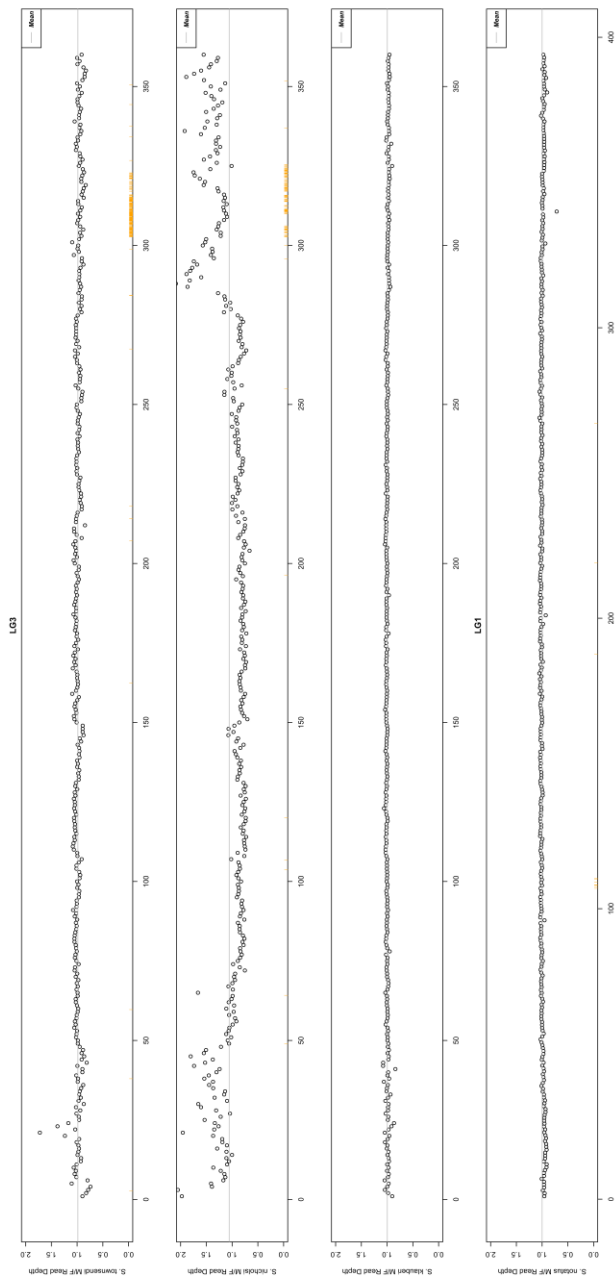

**Supplemental Figure 2:** *Sphaerodactylus* species with M/F WGS data. Comparing M/F read depth across sex chromosome linkage groups in each species LG3: *S. townsendi*, *S. nicholsi*, and *S. klauberi*; then LG1 for *S. notatus*, respectively.

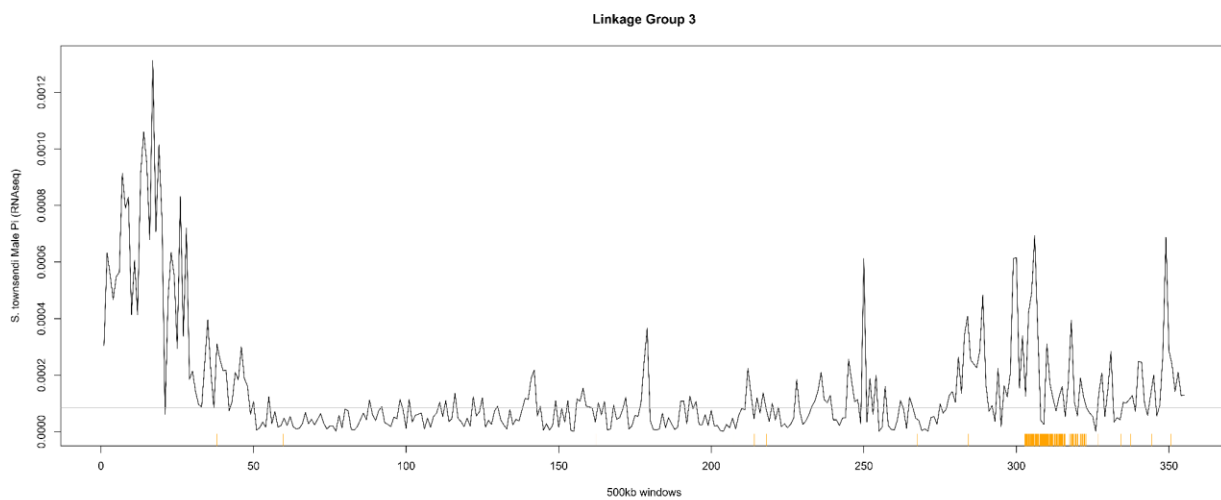

**Supplemental Figure 3:** *Sphaerodactylus townsendi*, male nucleotide diversity calculated from RNAseq data using vcftools. *S. townsendi* male-specific RADtags mapped to LG3 are denoted by orange ticks along the bottom of each graph. Grey horizontal line indicates the genomic mean value.

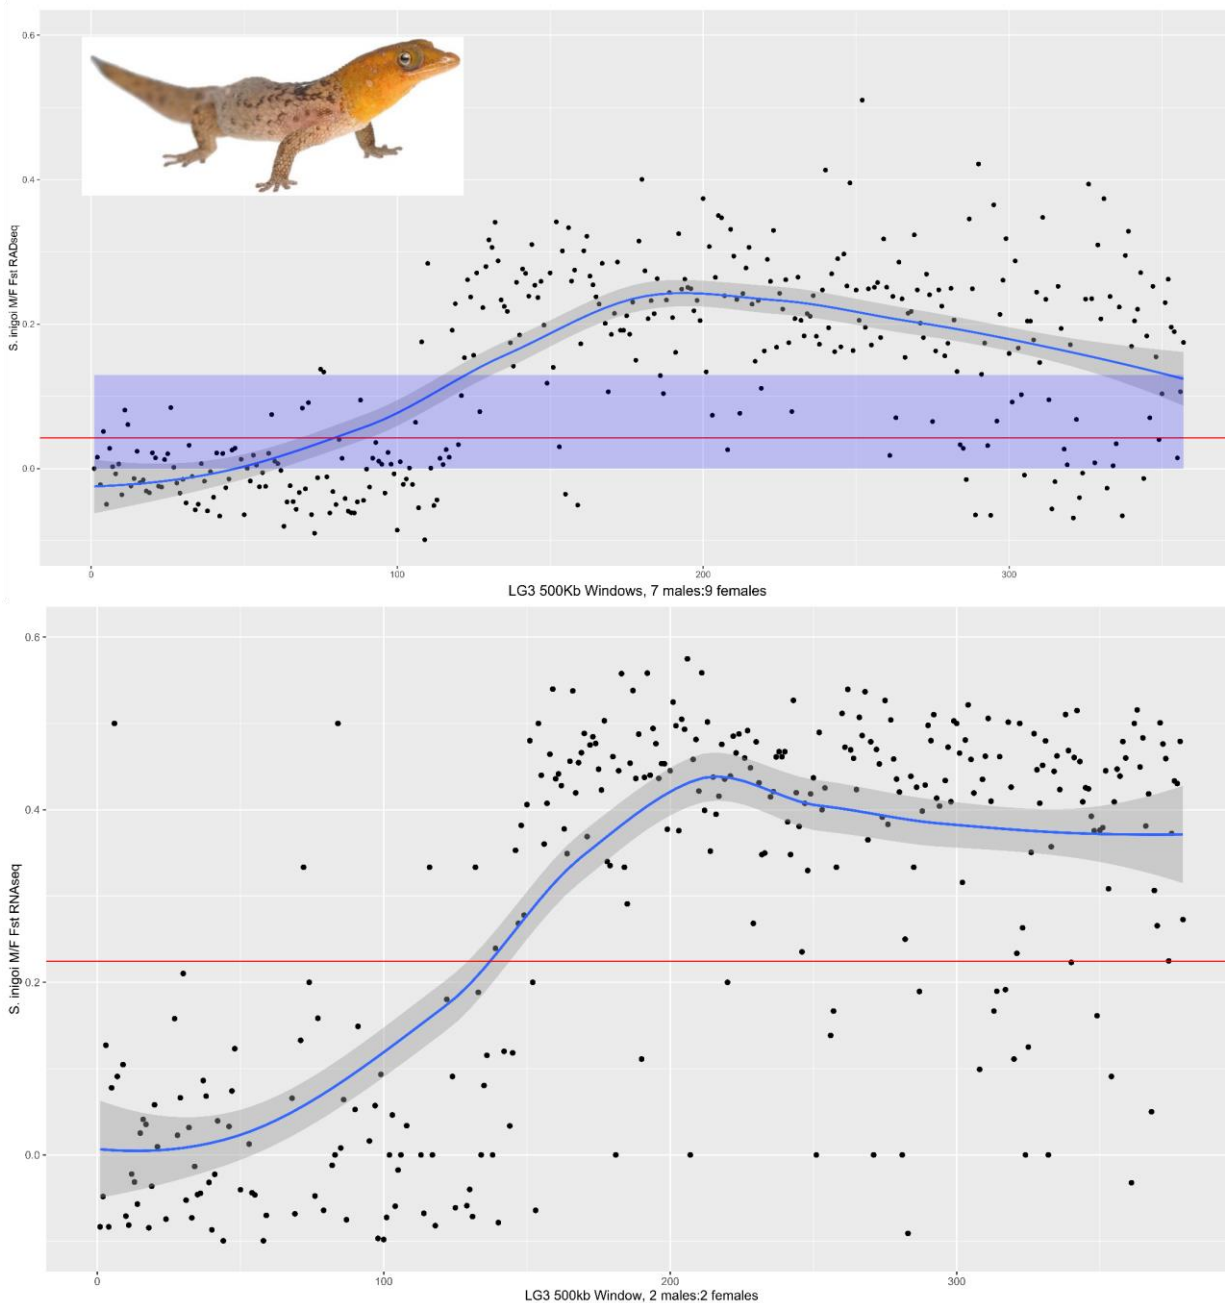

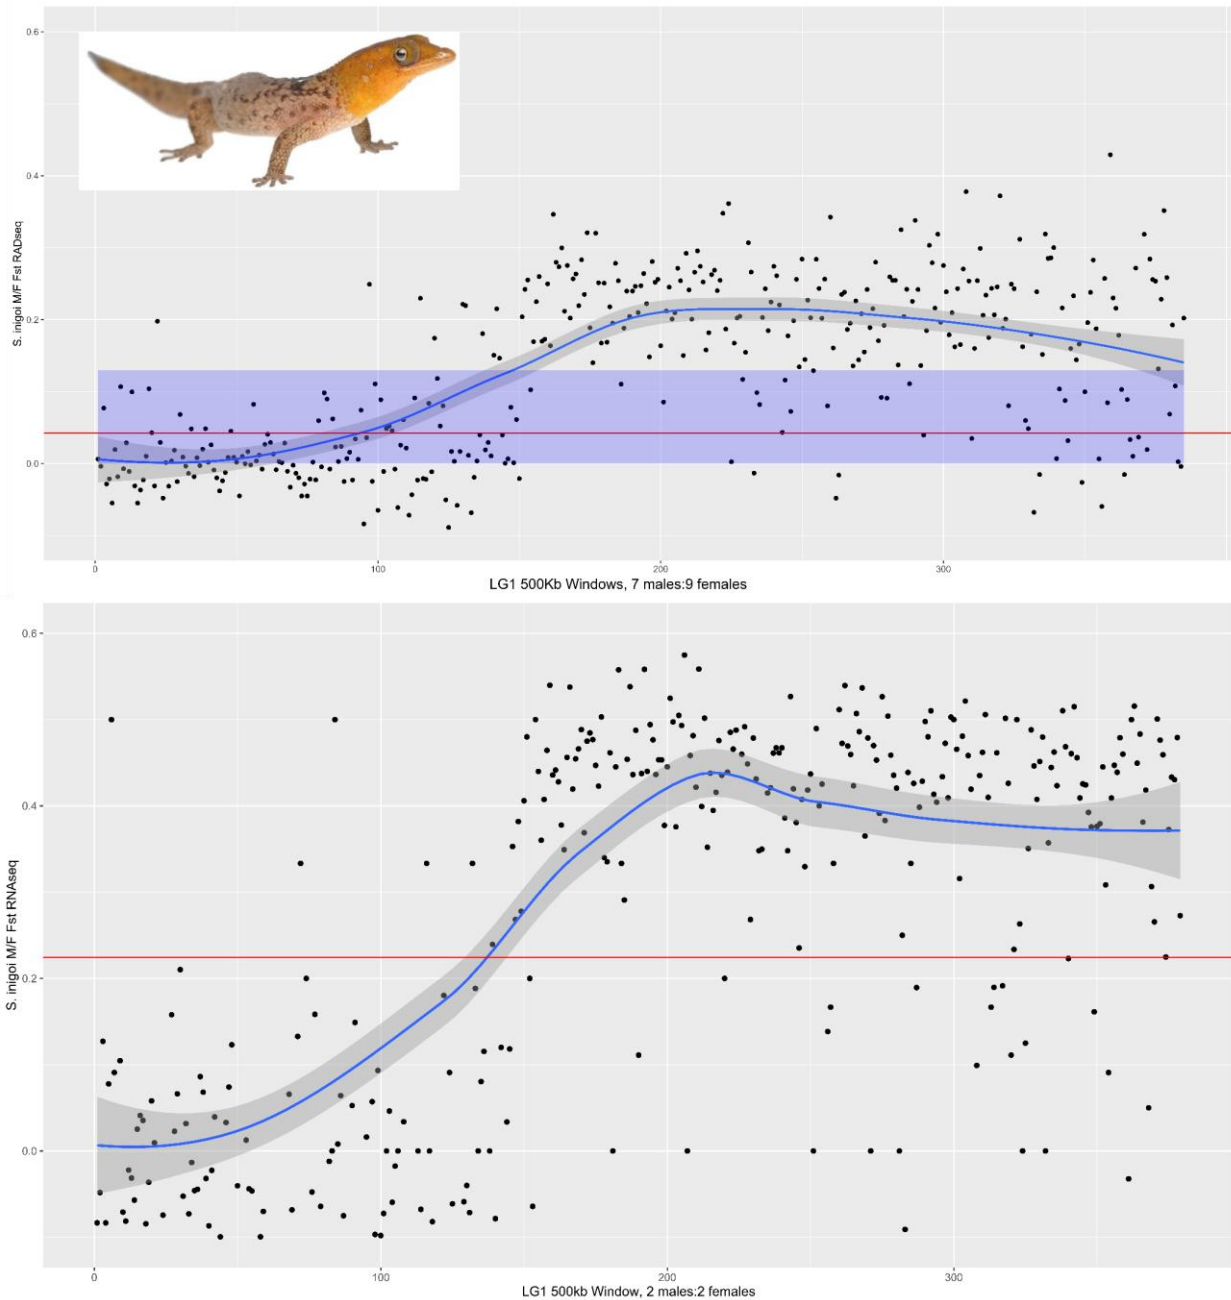

**Supplemental Figure 5:** *Sphaerodactylus inigoï*, comparison between M/F  $F_{st}$  values with RADseq (top) and RNAseq (bottom) data for *S. townsendi* LG1. Red line indicates the ‘autosomal’ mean (all other chromosomes except LG1 and LG3). Blue ribbon (top only) indicates the 95% confidence interval ( $\mu + 2\sigma$ ).

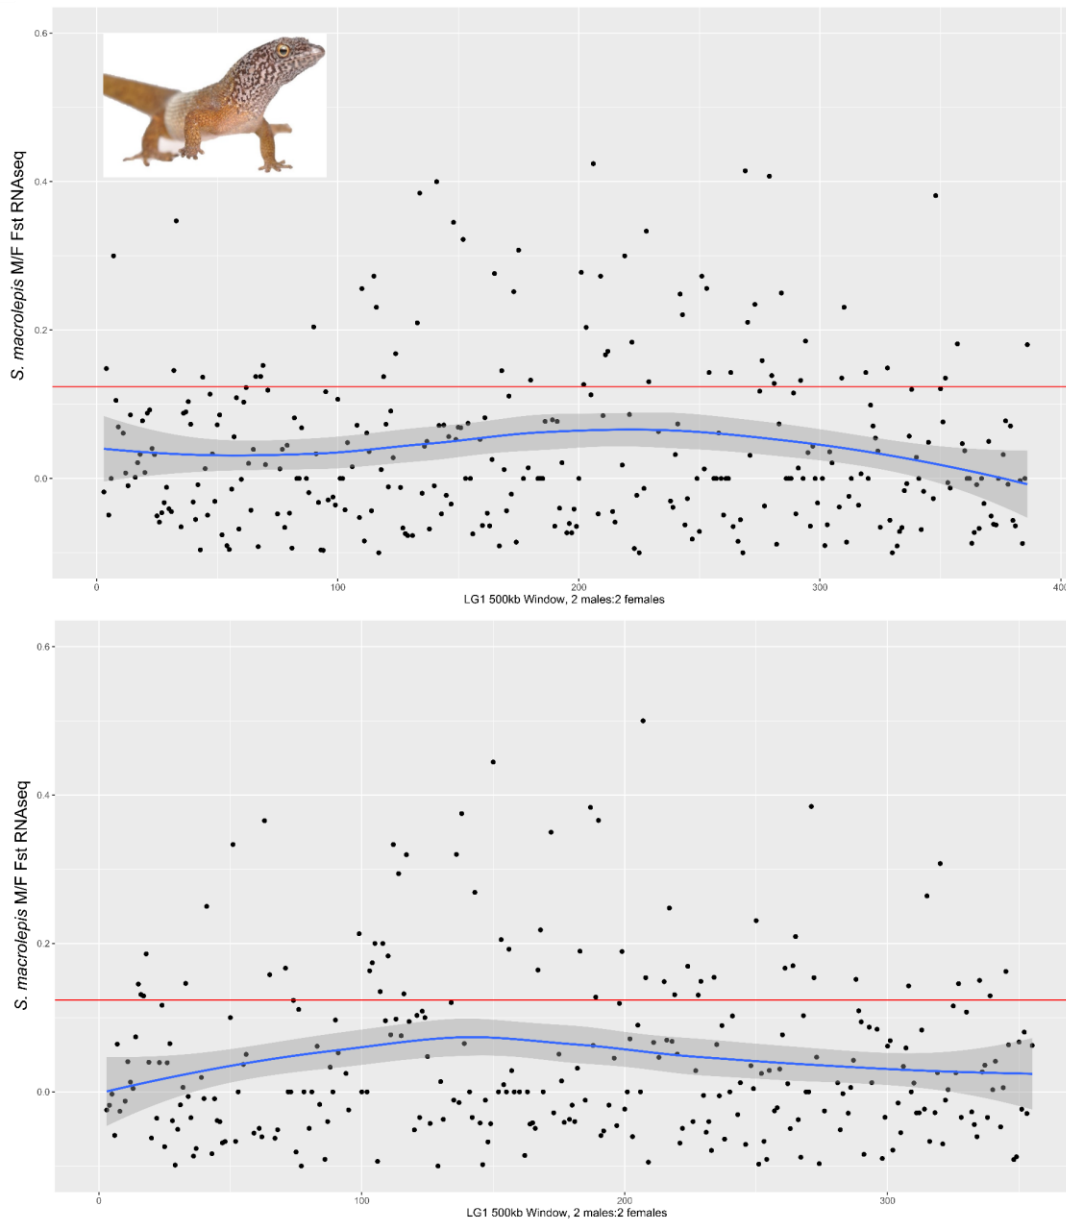

**Supplemental Figure 6:** *Sphaerodactylus macrolepis*, examination of M/F Fst values with RNAseq data across *S. townsendi* LG1 (top) and LG3 (bottom). Red line indicates the 'autosomal' mean (all other chromosomes except LG1 and LG3).

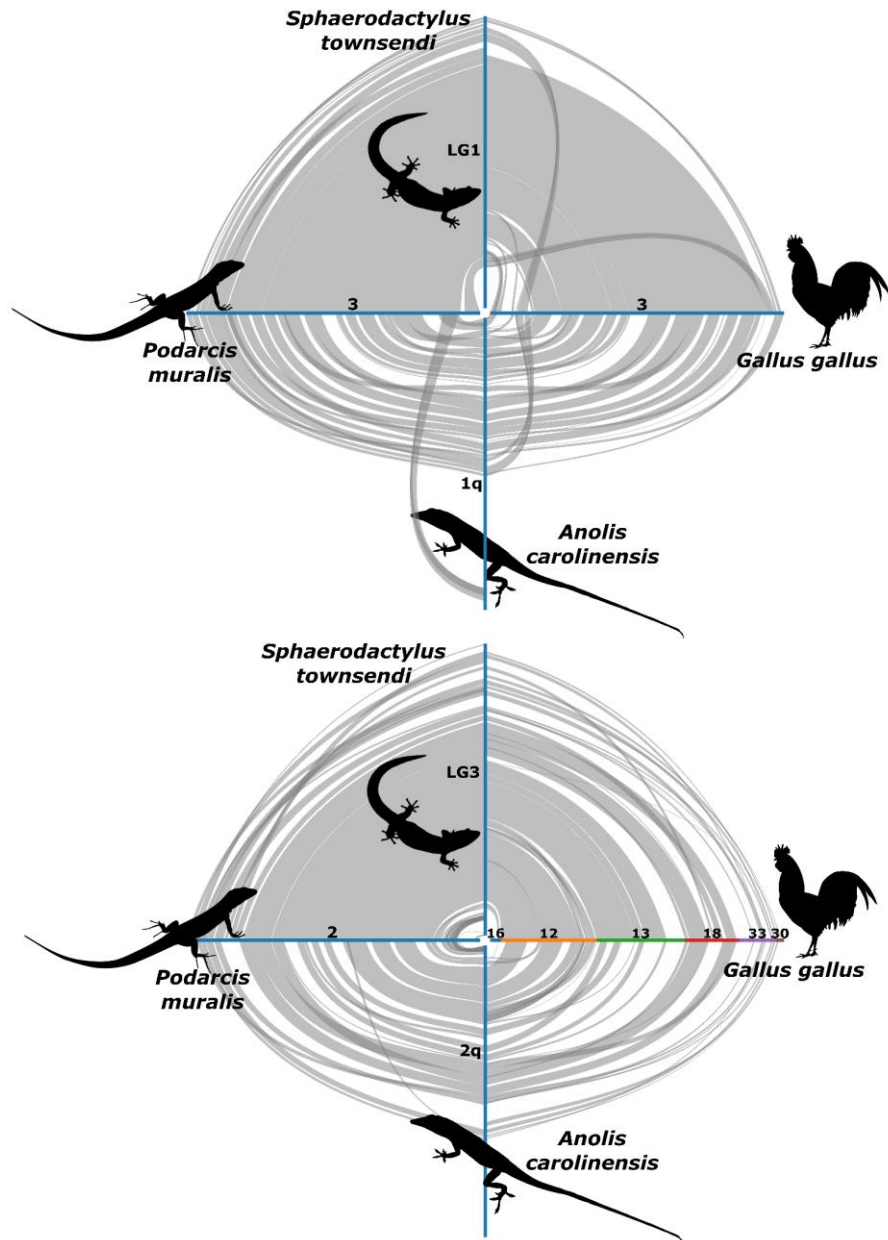

**Supplemental Figure 7:** Synteny of *Sphaerodactylus* sex chromosomes LG1 + LG3, the sex chromosomes linkage group in *Sphaerodactylus townsendi* relative to other squamates *Podarcis* and *Anolis*, and an outgroup, *Gallus*. Synteny plot generated using MCScanX and SynVisio, and silhouettes for *Podarcis*, *Anolis*, and *Gallus* were obtained from PhyloPic (*Anolis* by Sarah Werning and *Gallus* by Steven Traver).

Supplemental Table 1: Assembly stats

| <b>Version</b>                   | <b>Tool Used at Each Step</b> | <b>N50</b>  | <b>L50</b> |
|----------------------------------|-------------------------------|-------------|------------|
| <i>Assembly v1.1</i>             | SuperNova                     | 12,629,056  | 37         |
| <i>Assembly v1.2</i>             | Tigmint                       | 6,460,730   | 69         |
| <i>Assembly v1.3</i>             | ARCS                          | 7,457,274   | 57         |
| <i>Assembly v1.4</i>             | TGS-Gapcloser                 | 7,468,733   | 57         |
| <i>Assembly v1.5</i>             | Nextpolish                    | 7,605,248   | 57         |
| <i>Assembly v1.6</i>             | 3D-DNA                        | 126,215,344 | 7          |
| <i>Assembly v1.7</i>             | Redundancy-filter             | 134,006,883 | 6          |
| <i>Assembly v1.8-2.1</i>         | 10kb cutoff and annotation    | 134,006,883 | 6          |
| <b>Transcriptomes/Annotation</b> |                               |             |            |
| Embryo transcriptome             | runDRAP                       | 3,092       | 14,803     |
| Head transcriptome               | runDRAP                       | 2,750       | 15,526     |
| Meta transcriptome               | RunMeta                       | 2,320       | 14,981     |
| Annotated transcripts            | Funannotate                   | 1,380       | 6,110      |





| <b>L100</b> | <b>N-count</b> | <b>Gaps</b> | <b>Mean</b> | <b>Largest</b> | <b>Size</b>   | <b>CVG (C)</b> |
|-------------|----------------|-------------|-------------|----------------|---------------|----------------|
| 58,149      | 182,966,760    | 109,249     | 34,448      | 86,754,586     | 2,003,095,602 | 93.6%          |
| 59,469      | 179,364,669    | 109,143     | 33,622      | 52,059,470     | 1,999,493,511 | 93.6%          |
| 58,603      | 179,365,680    | 109,299     | 34,116      | 72,975,442     | 1,999,290,127 | 93.6%          |
| 58,603      | 67,505,130     | 10,696      | 34,374      | 73,487,924     | 2,014,429,111 | 94.9%          |
| 58,603      | 0              | 0           | 34,750      | 74,187,749     | 2,036,478,338 | 95.3%          |
| 56,114      | 248,900        | 2,489       | 36,296      | 196,877,829    | 2,036,727,238 | 95.7%          |
| 32,127      | 248,900        | 2,489       | 60,120      | 196,877,829    | 1,931,485,387 | 95.7%          |
| 1,823       | 248,800        | 2,488       | 997,312     | 196,877,829    | 1,818,099,321 | 95.7%          |

---

---

---

---

---

| <b>Tetra (C)</b> | <b>Tetra (C+P)</b> | <b>Tetra (S)</b> | <b>Tetra (D)</b> | <b>Tetra (F)</b> | <b>Tetra (M)</b> |
|------------------|--------------------|------------------|------------------|------------------|------------------|
| 85.5%            | 92.7%              | 84.6%            | 0.9%             | 7.3%             | 7.3%             |
| 85.5%            | 92.7%              | 84.6%            | 0.9%             | 7.3%             | 7.3%             |
| 85.5%            | 92.7%              | 84.6%            | 0.9%             | 7.2%             | 7.3%             |
| 88.0%            | 93.4%              | 87.1%            | 0.9%             | 5.3%             | 6.7%             |
| 88.8%            | 93.7%              | 87.9%            | 0.9%             | 4.9%             | 6.3%             |
| 88.9%            | 93.8%              | 88.1%            | 0.8%             | 4.9%             | 6.2%             |
| 88.7%            | 93.2%              | 88.0%            | 0.7%             | 4.5%             | 6.8%             |
| 88.3%            | 92.2%              | 87.6%            | 0.7%             | 3.9%             | 7.8%             |

|       |       |       |       |       |       |
|-------|-------|-------|-------|-------|-------|
| 82.7% | 85.4% | 55.7% | 27.0% | 2.6%  | 14.7% |
| 81.6% | 86.9% | 58.0% | 23.6% | 53.0% | 13.1% |
| 80.5% | 83.8% | 68.2% | 12.3% | 3.4%  | 16.1% |
| 57.5% | 76.3% | 56.9% | 0.6%  | 18.8% | 23.7% |

Supplemental Table 2: Comparative Lepidsaur genome information.

| <u>Common Name</u>             | <u>Clade</u>             | <u>Scaffold N50 (Mb)</u> | <u>Scaffold L50</u> |
|--------------------------------|--------------------------|--------------------------|---------------------|
| King cobra                     | Elapidae                 | 0.24                     | 1,750               |
| Eastern garter snake           | Colubridae               | 0.65                     | 639                 |
| Leopard gecko                  | Eublepharidae            | 0.66                     | 796                 |
| Schlegel's Japanese gecko      | Gekkonidae               | 0.68                     | 963                 |
| Glass lizard                   | Anguidae                 | 1.3                      | 408                 |
| Shaw's Sea Snake               | Elapidae                 | 1.4                      | 353                 |
| Chinese crocodile lizard       | Shinisauridae            | 1.5                      | 385                 |
| Five-pace viper                | Viperidae                | 2.1                      | 199                 |
| Central bearded dragon         | Agamidae                 | 2.3                      | 219                 |
| Tuatara                        | Sphenodontidae           | 3.0                      | 370                 |
| Madagascar ground gecko        | Gekkonidae               | 4.1                      | 93                  |
| Boa constrictor                | Boidae                   | 4.5                      | 90                  |
| Eastern Brown Snake            | Elapidae                 | 14.7                     | 31                  |
| Komodo dragon                  | Varanidae                | 23.8                     | 17                  |
| European wall lizard           | Lacertidae               | 92.4                     | 7                   |
| Madagascar ground gecko        | Gekkonidae               | 109.0                    | 6                   |
| <b>Townsend's dwarf gecko</b>  | <b>Sphaerodactylidae</b> | <b>134.0</b>             | <b>6</b>            |
| Green anole                    | Iguanidae                | 151.0                    | 5                   |
| Brown anole                    | Iguanidae                | 253.6                    | 4                   |
| Burmese python                 | Pythonidae               | 196.0                    | 3                   |
| Prairie rattlesnake            | Viperidae                | 197.9                    | 3                   |
| Indian cobra                   | Elapidae                 | 224.1                    | 3                   |
| Desert horned lizard           | Phrynosomatidae          | 273.2                    | 3                   |
| Eastern Fence Lizard           | Phrynosomatidae          | 275.0                    | 3                   |
| Chinese crocodile lizard       | Shinisauridae            | 297.0                    | 4                   |
| Argentine black and white tegu | Teiidae                  | 314.2                    | 3                   |

| <u>Total Scaffolds</u> | <u>Reference</u>                          | <u>Technology</u>                  |
|------------------------|-------------------------------------------|------------------------------------|
| 296,399                | Vonk et al. 2013                          | Illumina-only                      |
| 7,930                  | Perry et al. 2018                         | Illumina-only                      |
| 206,400                | Xiong et al. 2016                         | Illumina-only                      |
| 191,500                | Liu et al. 2015                           | Illumina-only                      |
| 6,715                  | Song et al. 2015                          | Illumina-only                      |
| 3,139                  | Peng et al. 2020                          | Illumina, PacBio                   |
| 1,257,129              | Gao et al. 2017                           | Illumina-only                      |
| 162,571                | Yin et al. 2016                           | Illumina-only                      |
| 545,310                | Georges et al. 2015                       | Illumina-only                      |
| 16,536                 | Gemmell et al. 2020                       | Illumina, mate pairs, Chicago      |
| 110,900                | Hara et al. 2018                          | Illumina, mate pairs               |
| 19,927                 | Card et al. 2019                          | Illumina-only                      |
| 28,550                 | University of New South Wales             | 10X                                |
| 1,411                  | Lind et al. 2019                          | 10X, ONT, PacBio, HiC              |
| 2,160                  | Andrade et al. 2019                       | Illumina, PacBio, HiC, Chicago     |
| 4,877                  | Yamaguchi et al. 2021                     | Illumina, mate pairs, HiC          |
| <b>1,823</b>           | <b>Pinto et al. 2021 (MPM_Stown_v2.2)</b> | <b>10X, ONT, Illumina, HiC</b>     |
| 6,457                  | Alfoldi et al. 2011                       | Sanger, physical mapped            |
| 3,738                  | Geneva et al. 2021                        | Illumina, PacBio, HiC, Chicago     |
| 29,190                 | Castoe et al. 2013                        | Illumina, HiC (DNAZoo)             |
| 7,043                  | Schild et al. 2019                        | Illumina, mate pairs, HiC, Chicago |
| 1,897                  | Suryamohan et al. 2020                    | Everything                         |
| 5,291                  | Koochekian et al. 2022                    | Illumina, Chicago, Hi-C            |
| 24                     | Westfall et al. 2021                      | 10X, PacBio, HiC                   |
| 1,553                  | Xie et al. 2022                           | PacBio, 10X, HiC                   |
| 4,375                  | Roscito et al. 2018                       | Illumina, PacBio, OM, HiC (DNAZoo) |

### **Assembly Link**

<https://www.ncbi.nlm.nih.gov/genome/10842>  
<https://www.ncbi.nlm.nih.gov/genome/16688>  
<http://dx.doi.org/10.5524/100246>  
[https://www.ncbi.nlm.nih.gov/assembly/GCF\\_001447785.1](https://www.ncbi.nlm.nih.gov/assembly/GCF_001447785.1)  
<http://dx.doi.org/10.5524/100119>  
<https://doi.org/10.6084/m9.figshare.11391606.v5>  
<http://dx.doi.org/10.5524/100315>  
<http://dx.doi.org/10.5524/100196>  
[https://useast.ensembl.org/Pogona\\_vitticeps/Info/Index](https://useast.ensembl.org/Pogona_vitticeps/Info/Index)  
[https://useast.ensembl.org/Sphenodon\\_punctatus/Info/Index](https://useast.ensembl.org/Sphenodon_punctatus/Info/Index)  
<https://doi.org/10.6084/m9.figshare.6220406.v1>  
<http://darencard.net/boaCon/>  
[https://www.ncbi.nlm.nih.gov/genome/?term=txid8673\[orgn\]](https://www.ncbi.nlm.nih.gov/genome/?term=txid8673[orgn])  
[https://useast.ensembl.org/Varanus\\_komodoensis/Info/Index](https://useast.ensembl.org/Varanus_komodoensis/Info/Index)  
[https://useast.ensembl.org/Podarcis\\_muralis/Info/Index](https://useast.ensembl.org/Podarcis_muralis/Info/Index)  
[https://www.ncbi.nlm.nih.gov/assembly/GCA\\_003118565.2/](https://www.ncbi.nlm.nih.gov/assembly/GCA_003118565.2/)  
**[https://www.ncbi.nlm.nih.gov/assembly/GCA\\_021028975.1](https://www.ncbi.nlm.nih.gov/assembly/GCA_021028975.1)**  
[https://useast.ensembl.org/Anolis\\_carolinensis/Info/Index](https://useast.ensembl.org/Anolis_carolinensis/Info/Index)  
<https://dataverse.harvard.edu/dataset.xhtml?persistentId=doi:10.7910/DVN/TTKBFU>  
[https://www.dnazoo.org/assemblies/Python\\_bivittatus](https://www.dnazoo.org/assemblies/Python_bivittatus)  
[https://www.ncbi.nlm.nih.gov/assembly/GCA\\_003400415.2](https://www.ncbi.nlm.nih.gov/assembly/GCA_003400415.2)  
<https://www.ncbi.nlm.nih.gov/genome/8395>  
[https://www.ncbi.nlm.nih.gov/assembly/GCA\\_020142125.1](https://www.ncbi.nlm.nih.gov/assembly/GCA_020142125.1)  
[https://www.ncbi.nlm.nih.gov/genome?LinkName=nucore\\_genome&from\\_uid=2064852242](https://www.ncbi.nlm.nih.gov/genome?LinkName=nucore_genome&from_uid=2064852242)  
[https://www.ncbi.nlm.nih.gov/assembly/GCA\\_021292165.1](https://www.ncbi.nlm.nih.gov/assembly/GCA_021292165.1)  
[https://www.dnazoo.org/assemblies/Salvator\\_merianae](https://www.dnazoo.org/assemblies/Salvator_merianae)

Supplemental Table 3: Sample information used in this study.

| <b><u>Species</u></b> | <b><u>Individual</u></b> | <b><u>Sex</u></b> | <b><u>Experiment</u></b> | <b><u>Tissue</u></b> | <b><u>Bioproject</u></b> |
|-----------------------|--------------------------|-------------------|--------------------------|----------------------|--------------------------|
| <i>S. townsendi</i>   | TG3544                   | M                 | 10X                      | Blood/liver          | PRJNA746057              |
| <i>S. townsendi</i>   | TG3544                   | M                 | ONT                      | Blood/liver          | PRJNA746057              |
| <i>S. townsendi</i>   | TG3544                   | M                 | DNaseq                   | Tail                 | PRJNA746057              |
| <i>S. townsendi</i>   | TG3718                   | M                 | HiC                      | Blood/liver          | PRJNA746057              |
| <i>S. townsendi</i>   | TG3828                   | F                 | DNaseq                   | Tail                 | PRJNA746057              |
| <i>S. nicholsi</i>    | TG1951                   | M                 | DNaseq                   | Tail                 | PRJNA746057              |
| <i>S. nicholsi</i>    | TG2115                   | F                 | DNaseq                   | Tail                 | PRJNA746057              |
| <i>S. klauberi</i>    | TG2759                   | M                 | DNaseq                   | Tail                 | PRJNA746057              |
| <i>S. klauberi</i>    | TG2760                   | F                 | DNaseq                   | Tail                 | PRJNA746057              |
| <i>S. macrolepis</i>  | TG2721                   | M                 | DNaseq                   | Tail                 | PRJNA746057              |
| <i>S. notatus</i>     | TG3846                   | M                 | DNaseq                   | Tail                 | PRJNA746057              |
| <i>S. notatus</i>     | TG3847                   | F                 | DNaseq                   | Tail                 | PRJNA746057              |
| <i>S. townsendi</i>   | TG3715                   | Unknown           | RNAseq                   | Embryo               | PRJNA746057              |
| <i>S. townsendi</i>   | TG3467                   | M                 | RNAseq                   | Head                 | PRJNA746057              |
| <i>S. inigoii</i>     | TG2751                   | M                 | RNAseq                   | Head                 | PRJNA746057              |
| <i>S. inigoii</i>     | TG2752                   | M                 | RNAseq                   | Head                 | PRJNA746057              |
| <i>S. inigoii</i>     | TG2754                   | F                 | RNAseq                   | Head                 | PRJNA746057              |
| <i>S. inigoii</i>     | TG2755                   | F                 | RNAseq                   | Head                 | PRJNA746057              |
| <i>S. macrolepis</i>  | TG2743                   | M                 | RNAseq                   | Head                 | PRJNA746057              |
| <i>S. macrolepis</i>  | TG2748                   | M                 | RNAseq                   | Head                 | PRJNA746057              |
| <i>S. macrolepis</i>  | TG2745                   | F                 | RNAseq                   | Head                 | PRJNA746057              |
| <i>S. macrolepis</i>  | TG2746                   | F                 | RNAseq                   | Head                 | PRJNA746057              |
| <i>S. townsendi</i>   | TG2020                   | M                 | RADseq                   | Tail                 | PRJNA746057              |
| <i>S. townsendi</i>   | TG2024                   | M                 | RADseq                   | Tail                 | PRJNA746057              |
| <i>S. townsendi</i>   | TG2025                   | M                 | RADseq                   | Tail                 | PRJNA746057              |
| <i>S. townsendi</i>   | TG2026                   | M                 | RADseq                   | Tail                 | PRJNA746057              |
| <i>S. townsendi</i>   | TG2028                   | M                 | RADseq                   | Tail                 | PRJNA746057              |
| <i>S. townsendi</i>   | TG3108                   | M                 | RADseq                   | Tail                 | PRJNA746057              |
| <i>S. townsendi</i>   | TG3869                   | M                 | RADseq                   | Tail                 | PRJNA746057              |
| <i>S. townsendi</i>   | TG3870                   | F                 | RADseq                   | Tail                 | PRJNA746057              |
| <i>S. townsendi</i>   | TG2021                   | F                 | RADseq                   | Tail                 | PRJNA746057              |
| <i>S. townsendi</i>   | TG2023                   | F                 | RADseq                   | Tail                 | PRJNA746057              |
| <i>S. townsendi</i>   | TG2059                   | F                 | RADseq                   | Tail                 | PRJNA746057              |
| <i>S. townsendi</i>   | TG3101                   | F                 | RADseq                   | Tail                 | PRJNA746057              |
| <i>S. townsendi</i>   | TG3110                   | F                 | RADseq                   | Tail                 | PRJNA746057              |
| <i>S. townsendi</i>   | TG3133                   | F                 | RADseq                   | Tail                 | PRJNA746057              |
| <i>S. nicholsi</i>    | TG1995                   | M                 | RADseq                   | Tail                 | PRJNA746057              |
| <i>S. nicholsi</i>    | TG2003                   | M                 | RADseq                   | Tail                 | PRJNA746057              |
| <i>S. nicholsi</i>    | TG2096                   | M                 | RADseq                   | Tail                 | PRJNA746057              |
| <i>S. nicholsi</i>    | TG2100                   | M                 | RADseq                   | Tail                 | PRJNA746057              |
| <i>S. nicholsi</i>    | TG3212                   | M                 | RADseq                   | Tail                 | PRJNA746057              |
| <i>S. nicholsi</i>    | TG3213                   | M                 | RADseq                   | Tail                 | PRJNA746057              |
| <i>S. nicholsi</i>    | TG2102                   | F                 | RADseq                   | Tail                 | PRJNA746057              |
| <i>S. nicholsi</i>    | TG2115                   | F                 | RADseq                   | Tail                 | PRJNA746057              |

|                    |        |   |        |      |                    |
|--------------------|--------|---|--------|------|--------------------|
| <i>S. nicholsi</i> | TG2666 | F | RADseq | Tail | PRJNA746057        |
| <i>S. nicholsi</i> | TG2672 | F | RADseq | Tail | PRJNA746057        |
| <i>S. nicholsi</i> | TG3214 | F | RADseq | Tail | PRJNA746057        |
| <i>S. nicholsi</i> | TG3216 | F | RADseq | Tail | PRJNA746057        |
| <i>S. notatus</i>  | TG3777 | M | RADseq | Tail | PRJNA746057        |
| <i>S. notatus</i>  | TG3778 | M | RADseq | Tail | PRJNA746057        |
| <i>S. notatus</i>  | TG3818 | M | RADseq | Tail | PRJNA746057        |
| <i>S. notatus</i>  | TG3820 | M | RADseq | Tail | PRJNA746057        |
| <i>S. notatus</i>  | TG3821 | M | RADseq | Tail | PRJNA746057        |
| <i>S. notatus</i>  | TG4158 | M | RADseq | Tail | PRJNA746057        |
| <i>S. notatus</i>  | TG4160 | M | RADseq | Tail | PRJNA746057        |
| <i>S. notatus</i>  | TG3815 | M | RADseq | Tail | PRJNA746057        |
| <i>S. notatus</i>  | TG3779 | F | RADseq | Tail | PRJNA746057        |
| <i>S. notatus</i>  | TG3780 | F | RADseq | Tail | PRJNA746057        |
| <i>S. notatus</i>  | TG3781 | F | RADseq | Tail | PRJNA746057        |
| <i>S. notatus</i>  | TG3819 | F | RADseq | Tail | PRJNA746057        |
| <i>S. notatus</i>  | TG4159 | F | RADseq | Tail | PRJNA746057        |
| <i>S. notatus</i>  | TG3816 | F | RADseq | Tail | PRJNA746057        |
| <i>S. notatus</i>  | TG3817 | F | RADseq | Tail | PRJNA746057        |
| <i>S. inigoï</i>   | TG2147 | M | RADseq | Tail | Gamble et al. 2015 |
| <i>S. inigoï</i>   | TG2050 | M | RADseq | Tail | Gamble et al. 2015 |
| <i>S. inigoï</i>   | TG1950 | M | RADseq | Tail | Gamble et al. 2015 |
| <i>S. inigoï</i>   | TG2046 | M | RADseq | Tail | Gamble et al. 2015 |
| <i>S. inigoï</i>   | TG1971 | M | RADseq | Tail | Gamble et al. 2015 |
| <i>S. inigoï</i>   | TG2145 | M | RADseq | Tail | Gamble et al. 2015 |
| <i>S. inigoï</i>   | TG2018 | M | RADseq | Tail | Gamble et al. 2015 |
| <i>S. inigoï</i>   | TG2148 | F | RADseq | Tail | Gamble et al. 2015 |
| <i>S. inigoï</i>   | TG1929 | F | RADseq | Tail | Gamble et al. 2015 |
| <i>S. inigoï</i>   | TG2146 | F | RADseq | Tail | Gamble et al. 2015 |
| <i>S. inigoï</i>   | TG1979 | F | RADseq | Tail | Gamble et al. 2015 |
| <i>S. inigoï</i>   | TG1980 | F | RADseq | Tail | Gamble et al. 2015 |
| <i>S. inigoï</i>   | TG2047 | F | RADseq | Tail | Gamble et al. 2015 |
| <i>S. inigoï</i>   | TG1981 | F | RADseq | Tail | Gamble et al. 2015 |
| <i>S. inigoï</i>   | TG2048 | F | RADseq | Tail | Gamble et al. 2015 |
| <i>S. inigoï</i>   | TG2049 | F | RADseq | Tail | Gamble et al. 2015 |



**SRA Accession**

SAMN20179316

SAMN20179317

SAMN20179318

SAMN20179319

SAMN20179320

SAMN20179321

SAMN20179322

SAMN20179331

SAMN20179323

SAMN20179324

SAMN20179325

SAMN20179326

SAMN20179327

SAMN20179328

SAMN20179329

SAMN20179330

SAMN20179332

SAMN20179333

SAMN20179334

SAMN20179335

SAMN20179336

SAMN20179337

SAMN20179338

SAMN20179339

SAMN20179340

SAMN20179341

SAMN20179342

SAMN20179343

SAMN20179344

SAMN20179345

SAMN20179346

SAMN20179347

SAMN20179348

SAMN20179349

SAMN20179350

SAMN20179351

SAMN20179352

SAMN20179353

SAMN20179354

SAMN20179355

SAMN20179356

SAMN20179320

SAMN20179357  
SAMN20179358  
SAMN20179359  
SAMN20179360  
SAMN20179361  
SAMN20179362  
SAMN20179363  
SAMN20179364  
SAMN20179365  
SAMN20179366  
SAMN20179367  
SAMN20179368  
SAMN20179369  
SAMN20179370  
SAMN20179371  
SAMN20179372  
SAMN20179373  
SAMN20179374  
SAMN20179375  
SRS815283  
SRS815281  
SRS815277  
SRS815280  
SRS815278  
SRS815282  
SRS815279  
SRS815276  
SRS815268  
SRS815275  
SRS815270  
SRS815269  
SRS815272  
SRS815271  
SRS815273  
SRS815274
